# Supplementary material for: Trends in Targeted Therapy Usage in Inflammatory Bowel Disease: TRENDY Study of ENEIDA
Source: MDPI journal article supplement (doi:10.3390/pharmaceutics16050629), 2024-05-08
Supplement: s1 [file s1]

## SUPPLEMENTARY MATERIALS

**SUPPLEMENTARY TABLE S1:** Treatment distribution per healthcare centre score (IASIST level) and by line of treatment (LoT) in Crohn's disease (A) and ulcerative colitis (B).

| Crohn's disease     |              |                                  |                          |                       |                       |                          |                       |                       |                           |                           |                   |
|---------------------|--------------|----------------------------------|--------------------------|-----------------------|-----------------------|--------------------------|-----------------------|-----------------------|---------------------------|---------------------------|-------------------|
| A                   | IASIST level | Anti-TNF $\alpha$ , <i>n</i> (%) | Infliximab, <i>n</i> (%) | Infliximab originator | Infliximab biosimilar | Adalimumab, <i>n</i> (%) | Adalimumab originator | Adalimumab biosimilar | Vedolizumab, <i>n</i> (%) | Ustekinumab, <i>n</i> (%) | Overall, <i>n</i> |
| 1 <sup>st</sup> Lot | 2            | 61 (87.1)                        | 36 (51.4)                | 12 (17.1)             | 24 (34.3)             | 25 (35.7)                | 22 (31.4)             | 3 (4.3)               | 3 (4.3)                   | 6 (8.6)                   | 70                |
|                     | 3            | 672 (84.6)                       | 245 (30.8)               | 67 (8.4)              | 178 (22.4)            | 426 (53.7)               | 281 (35.4)            | 145 (18.3)            | 50 (6.3)                  | 71 (9)                    | 792               |
|                     | 4            | 1,511 (80)                       | 693 (36.7)               | 94 (5)                | 599 (31.7)            | 814 (43.1)               | 500 (26.5)            | 314 (16.6)            | 149 (7.9)                 | 227 (12)                  | 1,883             |
|                     | 5            | 3,159 (78.9)                     | 1,434 (35.8)             | 310 (7.7)             | 1,124 (28.1)          | 1,717 (42.9)             | 1,107 (27.7)          | 610 (15.2)            | 302 (7.5)                 | 539 (13.5)                | 3,992             |
| 2 <sup>nd</sup> LoT | 2            | 2 (12.4)                         | 1 (6.2)                  | 0 (0)                 | 1 (6.2)               | 1 (6.2)                  | 1 (6.2)               | 0 (0)                 | 2 (12.5)                  | 12 (75.0)                 | 16                |
|                     | 3            | 105 (45)                         | 53 (22.7)                | 11 (4.7)              | 42 (18)               | 51 (21.9)                | 40 (17.2)             | 11 (4.7)              | 19 (8.2)                  | 109 (46.8)                | 232               |
|                     | 4            | 211 (40.2)                       | 95 (18.1)                | 11 (2.1)              | 84 (16)               | 114 (21.7)               | 71 (13.5)             | 43 (8.2)              | 75 (14.3)                 | 239 (45.5)                | 523               |
|                     | 5            | 507 (41.4)                       | 261 (21.3)               | 40 (3.3)              | 221 (18)              | 244 (19.9)               | 168 (13.7)            | 76 (6.2)              | 136 (11.1)                | 580 (47.3)                | 1,221             |
| 3 <sup>rd</sup> LoT | 2            | 0 (0)                            | 0 (0)                    | 0 (0)                 | 0 (0)                 | 0 (0)                    | 0 (0)                 | 0 (0)                 | 0 (0)                     | 2 (100)                   | 2                 |
|                     | 3            | 10 (13.3)                        | 10 (13.3)                | 3 (4)                 | 7 (9.3)               | 0 (0)                    | 0 (0)                 | 0 (0)                 | 16 (21.3)                 | 49 (65.3)                 | 75                |
|                     | 4            | 34 (24.1)                        | 17 (12)                  | 2 (1.4)               | 15 (10.6)             | 16 (11.4)                | 9 (6)                 | 7 (5)                 | 36 (25.5)                 | 71 (50.4)                 | 140               |
|                     | 5            | 91 (29.8)                        | 49 (16)                  | 5 (1.6)               | 44 (14.4)             | 40 (13.1)                | 19 (6.2)              | 21 (6.9)              | 56 (18.3)                 | 155 (50.7)                | 300               |

| Ulcerative colitis  |              |                                  |                          |                       |                       |                          |                       |                       |                         |                           |                           |                           |                   |
|---------------------|--------------|----------------------------------|--------------------------|-----------------------|-----------------------|--------------------------|-----------------------|-----------------------|-------------------------|---------------------------|---------------------------|---------------------------|-------------------|
| B                   | IASIST level | Anti-TNF $\alpha$ , <i>n</i> (%) | Infliximab, <i>n</i> (%) | Infliximab originator | Infliximab biosimilar | Adalimumab, <i>n</i> (%) | Adalimumab originator | Adalimumab biosimilar | Golimumab, <i>n</i> (%) | Vedolizumab, <i>n</i> (%) | Ustekinumab, <i>n</i> (%) | Tofacitinib, <i>n</i> (%) | Overall, <i>n</i> |
| 1 <sup>st</sup> LoT | 2            | 10 (71.4)                        | 7 (50)                   | 1 (7.1)               | 6 (42.9)              | 2 (14.3)                 | 2 (14.3)              | 0 (0)                 | 1 (7.1)                 | 4 (28.6)                  | 0 (0)                     | 0 (0)                     | 14                |
|                     | 3            | 284 (89.3)                       | 165 (51.9)               | 34 (10.7)             | 131 (41.2)            | 92 (28.9)                | 55 (17.3)             | 37 (11.6)             | 27 (8.5)                | 29 (9.1)                  | 3 (0.9)                   | 2 (0.6)                   | 318               |
|                     | 4            | 657 (85.1)                       | 359 (46.5)               | 70 (9.1)              | 289 (37.4)            | 194 (25.1)               | 110 (14.2)            | 84 (10.9)             | 104 (13.5)              | 107 (13.8)                | 5 (0.6)                   | 4 (0.5)                   | 773               |
|                     | 5            | 1,372 (82.5)                     | 705 (42.4)               | 155 (9.3)             | 550 (33.1)            | 423 (25.4)               | 297 (17.8)            | 126 (7.6)             | 244 (14.7)              | 273 (16.4)                | 11 (0.7)                  | 8 (0.5)                   | 1,664             |
| 2 <sup>nd</sup> LoT | 2            | 2 (50)                           | 2 (50)                   | 2 (50)                | 0 (0)                 | 0 (0)                    | 0 (0)                 | 0 (0)                 | 0 (0)                   | 1 (25)                    | 1 (25)                    | 0 (0)                     | 4                 |
|                     | 3            | 52 (44.8)                        | 24 (20.7)                | 6 (5.2)               | 18 (15.5)             | 22 (18.9)                | 12 (10.3)             | 10 (8.6)              | 6 (5.2)                 | 42 (36.2)                 | 10 (8.6)                  | 12 (10.3)                 | 116               |
|                     | 4            | 123 (41.7)                       | 55 (18.6)                | 13 (4.4)              | 42 (14.2)             | 43 (14.6)                | 28 (9.5)              | 15 (5.1)              | 25 (8.5)                | 153 (51.9)                | 13 (4.4)                  | 6 (2)                     | 295               |
|                     | 5            | 285 (45.4)                       | 149 (23.8)               | 28 (4.5)              | 121 (19.3)            | 105 (16.7)               | 74 (11.8)             | 31 (4.9)              | 31 (4.9)                | 266 (42.4)                | 36 (5.7)                  | 40 (6.4)                  | 627               |
| 3 <sup>rd</sup> LoT | 2            | 0 (0)                            | 0 (0)                    | 0 (0)                 | 0 (0)                 | 0 (0)                    | 0 (0)                 | 0 (0)                 | 0 (0)                   | 0 (0)                     | 0 (0)                     | 0 (0)                     | 1                 |
|                     | 3            | 7 (18.9)                         | 3 (8.1)                  | 1 (2.7)               | 2 (5.4)               | 2 (5.4)                  | 0 (0)                 | 2 (5.4)               | 2 (5.4)                 | 12 (32.4)                 | 7 (18.9)                  | 11 (29.7)                 | 37                |
|                     | 4            | 20 (18.7)                        | 9 (8.4)                  | 1 (0.9)               | 8 (7.5)               | 4 (3.7)                  | 1 (0.9)               | 3 (2.8)               | 7 (6.6)                 | 44 (41.5)                 | 27 (25.5)                 | 15 (14.2)                 | 106               |
|                     | 5            | 47 (18.4)                        | 27 (10.5)                | 8 (3.1)               | 19 (7.4)              | 15 (5.9)                 | 10 (3.9)              | 5 (2)                 | 5 (2.0)                 | 97 (37.9)                 | 46 (18)                   | 66 (25.8)                 | 256               |

**SUPPLEMENTARY TABLE S2.** Prescription of targeted therapies for inflammatory bowel disease in Spain since 2015. n=14,463.

|                                           | 2015       | 2016         | 2017         | 2018         | 2019         | 2020         | 2021       | p value |
|-------------------------------------------|------------|--------------|--------------|--------------|--------------|--------------|------------|---------|
| <b>anti-TNF<math>\alpha</math>, n (%)</b> | 828 (87.1) | 1,805 (81.7) | 1,704 (72.6) | 1,685 (62.1) | 1,558 (60.6) | 1,301 (60.1) | 907 (60.2) | <0.001  |
| Infliximab, n (%)                         | 436 (45.8) | 944 (42.7)   | 829 (35.3)   | 821 (30.3)   | 672 (26.1)   | 589 (27.2)   | 378 (25.1) | -       |
| Infliximab originator                     | 200 (21)   | 286 (12.9)   | 184 (7.8)    | 106 (3.9)    | 71 (2.8)     | 47 (2.2)     | 19 (1.3)   | -       |
| Infliximab biosimilar                     | 236 (24.8) | 658 (29.8)   | 645 (27.5)   | 715 (26.3)   | 601 (23.4)   | 542 (25)     | 359 (23.8) | -       |
| Adalimumab, n (%)                         | 358 (37.6) | 782 (35.4)   | 752 (32)     | 757 (27.9)   | 790 (30.7)   | 666 (30.8)   | 505 (33.5) | -       |
| Adalimumab originator                     | 345 (36.3) | 753 (34.1)   | 711 (30.3)   | 698 (25.7)   | 353 (13.7)   | 72 (3.3)     | 40 (2.7)   | -       |
| Adalimumab biosimilar                     | 13 (1.4)   | 29 (1.3)     | 41 (1.7)     | 59 (2.2)     | 437 (17)     | 594 (27.4)   | 465 (30.9) | -       |
| Golimumab, n (%)                          | 34 (3.6)   | 79 (3.6)     | 123 (5.2)    | 107 (3.9)    | 96 (3.7)     | 46 (2.1)     | 24 (1.6)   | -       |
| <b>Vedolizumab, n (%)</b>                 | 106 (11.1) | 354 (16)     | 354 (15.1)   | 371 (13.7)   | 373 (14.5)   | 269 (12.4)   | 170 (11.3) | 0.07    |
| <b>Ustekinumab, n (%)</b>                 | 16 (1.7)   | 51 (2.3)     | 280 (11.9)   | 632 (23.3)   | 581 (22.6)   | 497 (23)     | 373 (24.8) | <0.001  |
| <b>Tofacitinib, n (%)</b>                 | 1 (0.1)    | 0 (0.0)      | 10 (0.4)     | 26 (1)       | 58 (2.3)     | 97 (4.5)     | 56 (3.7)   | <0.001  |
| Overall, n                                | 951        | 2,210        | 2,348        | 2,714        | 2,570        | 2,164        | 1,506      | -       |

| SUPPLEMENTARY TABLE S3: Treatment patterns in patients who received targeted therapies for fistulizing Crohn's disease. n=229 patients. Line of treatment (LoT). |                 |                   |                   |                    |                    |          |         |
|------------------------------------------------------------------------------------------------------------------------------------------------------------------|-----------------|-------------------|-------------------|--------------------|--------------------|----------|---------|
| Fistulizing Crohn's disease                                                                                                                                      |                 |                   |                   |                    |                    |          |         |
| Bio-naïve                                                                                                                                                        |                 |                   |                   |                    |                    |          |         |
|                                                                                                                                                                  | Anti-TNF, n (%) | Infliximab, n (%) | Adalimumab, n (%) | Ustekinumab, n (%) | Vedolizumab, n (%) | Total, n | P value |
| 1 <sup>st</sup> LoT                                                                                                                                              | 160 (84.7)      | 99 (52.3)         | 61 (32.2)         | 16 (8.4)           | 13 (6.8)           | 189      | <0.001  |
| 2 <sup>nd</sup> LoT                                                                                                                                              | 12 (57.1)       | 7 (33.3)          | 5 (23.8)          | 8 (38)             | 1 (4.7)            | 21       | 0.14    |
| 3 <sup>rd</sup> LoT                                                                                                                                              | 2 (100)         | 1 (50)            | 1 (50)            | 0 (0)              | 0 (0)              | 2        | 0.57    |
| Prior use of biologics for CD treatment                                                                                                                          |                 |                   |                   |                    |                    |          |         |
| 1 biologic                                                                                                                                                       |                 |                   |                   |                    |                    |          |         |
| 1 <sup>st</sup> LoT                                                                                                                                              | 21 (67.8)       | 15 (48.3)         | 6 (19.3)          | 7 (22.5)           | 3 (9.6)            | 31       | 0.01    |
| 2 <sup>nd</sup> LoT                                                                                                                                              | 2 (50)          | 1 (25)            | 1 (25)            | 2 (50)             | 0 (0)              | 4        | 0.57    |
| 2 biologics                                                                                                                                                      |                 |                   |                   |                    |                    |          |         |
| 1 <sup>st</sup> LoT                                                                                                                                              | 4 (50)          | 3 (37.5)          | 1 (12.5)          | 3 (37.5)           | 1 (12.5)           | 8        | 0.57    |

| SUPPLEMENTARY TABLE S4: Treatment indications in Crohn's disease and ulcerative colitis by line of treatment (LoT). |                                                |                     |                     |                     |                     |                     |                     |
|---------------------------------------------------------------------------------------------------------------------|------------------------------------------------|---------------------|---------------------|---------------------|---------------------|---------------------|---------------------|
|                                                                                                                     |                                                | Crohn's disease     |                     |                     | Ulcerative colitis  |                     |                     |
|                                                                                                                     |                                                | 1 <sup>st</sup> LoT | 2 <sup>nd</sup> LoT | 3 <sup>rd</sup> LoT | 1 <sup>st</sup> LoT | 2 <sup>nd</sup> LoT | 3 <sup>rd</sup> LoT |
| Treatment indication                                                                                                | Induction of remission, n (%)                  | 5,368 (76)          | 1,750 (74)          | 520 (77)            | 2,577 (88)          | 1,012 (88)          | 353 (92)            |
|                                                                                                                     | Maintenance of remission, n (%)                | 637 (9)             | 265 (11)            | 52 (8)              | 211 (7)             | 96 (8)              | 24 (6)              |
|                                                                                                                     | Fistulizing disease, n (%)                     | 497 (7)             | 128 (5)             | 32 (5)              | -                   | -                   | -                   |
|                                                                                                                     | Prophylaxis of post-surgical recurrence, n (%) | 333 (5)             | 128 (5)             | 51 (7)              | -                   | -                   | -                   |
|                                                                                                                     | Other, n (%)                                   | 254 (4)             | 96 (4)              | 21 (3)              | 132 (5)             | 46 (4)              | 8 (2)               |
|                                                                                                                     | Total                                          | 7,089               | 2,368               | 676                 | 2,920               | 1,154               | 385                 |

**SUPPLEMENTARY TABLE S5:** Reasons for treatment discontinuation in Crohn's disease (A) and ulcerative colitis (B) by line of treatment (LoT) in from 2015 to 2021.

| A. Crohn's disease.                   |                                          |                   |            |            |             |             |                   |
|---------------------------------------|------------------------------------------|-------------------|------------|------------|-------------|-------------|-------------------|
| Reasons for treatment discontinuation |                                          | Anti-TNF $\alpha$ | Infliximab | Adalimumab | Vedolizumab | Ustekinumab | Overall, <i>n</i> |
| 1 <sup>st</sup> LoT                   | Adverse event, <i>n</i> (%)              | 347 (89.4)        | 184 (47.4) | 163 (42)   | 25 (6.4)    | 16 (4.1)    | 388               |
|                                       | Primary non-response, <i>n</i> (%)       | 303 (69.3)        | 132 (30.2) | 168 (38.4) | 75 (17.2)   | 59 (13.5)   | 434               |
|                                       | Loss of secondary response, <i>n</i> (%) | 697 (83)          | 290 (34.5) | 406 (48.4) | 91 (10.8)   | 51 (6.1)    | 838               |
|                                       | Sustained remission, <i>n</i> (%)        | 101 (100)         | 70 (69.3)  | 31 (30.7)  | 0 (0)       | 0 (0)       | 101               |
|                                       | Other, <i>n</i> (%)                      | 601 (86.9)        | 351 (50.8) | 249 (36)   | 49 (7.1)    | 41 (5.9)    | 690               |
| 2 <sup>nd</sup> LoT                   | Adverse event, <i>n</i> (%)              | 65 (73.8)         | 41 (46.6)  | 24 (27.2)  | 7 (8.0)     | 16 (18.2)   | 88                |
|                                       | Primary non-response, <i>n</i> (%)       | 61 (33.8)         | 34 (18.8)  | 26 (14.4)  | 41 (22.7)   | 79 (43.6)   | 180               |
|                                       | Loss of secondary response, <i>n</i> (%) | 119 (56.1)        | 54 (25.5)  | 64 (30.1)  | 46 (21.7)   | 47 (22.2)   | 211               |
|                                       | Sustained remission, <i>n</i> (%)        | 8 (80.0)          | 5 (50.0)   | 3 (30)     | 1 (10)      | 1 (10)      | 10                |
|                                       | Other, <i>n</i> (%)                      | 84 (61.2)         | 53 (38.6)  | 31 (22.6)  | 16 (11.7)   | 37 (27)     | 137               |
| 3 <sup>rd</sup> LoT                   | Adverse event, <i>n</i> (%)              | 16 (80)           | 12 (60.0)  | 4 (20)     | 2 (10)      | 2 (10)      | 20                |
|                                       | Primary non-response, <i>n</i> (%)       | 9 (14.4)          | 4 (6.4)    | 5 (8)      | 27 (42.9)   | 27 (42.9)   | 63                |
|                                       | Loss of secondary response, <i>n</i> (%) | 14 (29.2)         | 7 (14.6)   | 7 (14.6)   | 11 (22.9)   | 23 (47.9)   | 48                |
|                                       | Sustained remission, <i>n</i> (%)        | 0 (0)             | 0 (0.0)    | 0 (0)      | 0 (0)       | 0 (0)       | 1                 |
|                                       | Other, <i>n</i> (%)                      | 7 (33.4)          | 6 (28.6)   | 1 (4.8)    | 2 (9.5)     | 12 (57.1)   | 21                |

| B. Ulcerative colitis                 |                                          |                   |            |            |           |             |             |             |                   |
|---------------------------------------|------------------------------------------|-------------------|------------|------------|-----------|-------------|-------------|-------------|-------------------|
| Reasons for treatment discontinuation |                                          | Anti-TNF $\alpha$ | Infliximab | Adalimumab | Golimumab | Vedolizumab | Ustekinumab | Tofacitinib | Overall, <i>n</i> |
| 1 <sup>st</sup> LoT                   | Adverse event, <i>n</i> (%)              | 147 (92.4)        | 106 (66.7) | 29 (18.2)  | 12 (7.5)  | 10 (6.3)    | 2 (1.3)     | 0 (0)       | 159               |
|                                       | Primary non-response, <i>n</i> (%)       | 300 (85.5)        | 126 (35.9) | 106 (30.2) | 68 (19.4) | 51 (14.5)   | 0 (0)       | 0 (0)       | 351               |
|                                       | Loss of secondary response, <i>n</i> (%) | 369 (85.3)        | 160 (37)   | 129 (29.8) | 80 (18.5) | 63 (14.5)   | 1 (0.2)     | 0 (0)       | 433               |
|                                       | Sustained remission, <i>n</i> (%)        | 68 (97.1)         | 52 (74.3)  | 12 (17.1)  | 4 (5.7)   | 2 (2.9)     | 0 (0)       | 0 (0)       | 70                |
|                                       | Other, <i>n</i> (%)                      | 242 (85.5)        | 150 (53)   | 61 (21.5)  | 31 (11)   | 39 (13.8)   | 2 (0.7)     | 0 (0)       | 283               |

|                     |                                          |           |           |           |           |           |           |       |     |
|---------------------|------------------------------------------|-----------|-----------|-----------|-----------|-----------|-----------|-------|-----|
| 2 <sup>nd</sup> LoT | Adverse event, <i>n</i> (%)              | 35 (83.3) | 19 (45.2) | 15 (35.7) | 1 (2.4)   | 7 (16.7)  | 0 (0)     | 0 (0) | 42  |
|                     | Primary non-response, <i>n</i> (%)       | 89 (48.8) | 42 (23)   | 32 (17.6) | 15 (8.2)  | 87 (47.8) | 6 (3.3)   | 0 (0) | 182 |
|                     | Loss of secondary response, <i>n</i> (%) | 73 (49.7) | 27 (18.4) | 29 (19.7) | 17 (11.6) | 71 (48.3) | 3 (2)     | 0 (0) | 147 |
|                     | Sustained remission, <i>n</i> (%)        | 8 (66.6)  | 4 (33.3)  | 3 (25)    | 1 (8.3)   | 4 (33.3)  | 0 (0)     | 0 (0) | 12  |
|                     | Other, <i>n</i> (%)                      | 49 (71)   | 30 (43.5) | 13 (18.8) | 6 (8.7)   | 18 (26.1) | 2 (2.9)   | 0 (0) | 69  |
| 3 <sup>rd</sup> LoT | Adverse event, <i>n</i> (%)              | 5 (71.4)  | 5 (71.4)  | 0 (0)     | 0 (0)     | 1 (14.3)  | 1 (14.3)  | 0 (0) | 7   |
|                     | Primary non-response, <i>n</i> (%)       | 13 (24.2) | 7 (13)    | 4 (7.5)   | 2 (3.7)   | 28 (51.9) | 13 (24.1) | 0 (0) | 54  |
|                     | Loss of secondary response, <i>n</i> (%) | 10 (20.3) | 3 (6.1)   | 4 (8.1)   | 3 (6.1)   | 29 (59.2) | 10 (20.4) | 0 (0) | 49  |
|                     | Sustained remission, <i>n</i> (%)        | 0 (0)     | 0 (0)     | 0 (0)     | 0 (0)     | 1 (100)   | 0 (0)     | 0 (0) | 1   |
|                     | Other, <i>n</i> (%)                      | 5 (38.5)  | 1 (7.7)   | 1 (7.7)   | 3 (23.1)  | 6 (46.2)  | 2 (15.4)  | 0 (0) | 13  |

**SUPPLEMENTARY TABLE S6:** Duration of treatments in days by reasons for discontinuation and by line of treatment (LoT) in Crohn's disease (A) and in ulcerative colitis (B). Interquartile range (IQR); Non available (N/A).

| A. Crohn's disease  |                            |              |            |            |             |             |         |
|---------------------|----------------------------|--------------|------------|------------|-------------|-------------|---------|
| 1 <sup>st</sup> LoT |                            |              | Infliximab | Adalimumab | Ustekinumab | Vedolizumab | p value |
|                     | Adverse event              | Median (IQR) | 153 (334)  | 243 (379)  | 242 (442)   | 107 (266)   | 0.05    |
|                     | Primary non-response       |              | 123 (213)  | 123 (173)  | 151 (197)   | 181 (181)   | 0.59    |
|                     | Loss of secondary response |              | 488 (518)  | 546 (518)  | 487 (441)   | 547 (397)   | 0.72    |
|                     | Sustained remission        |              | 730 (608)  | 396 (366)  | 0 (0)       | 1156 (N/A)  | 0.01    |
|                     | Other                      |              | 335 (503)  | 426 (573)  | 337 (305)   | 274 (307)   | 0.001   |
| 2 <sup>nd</sup> LoT | Adverse event              | Median (IQR) | 123 (381)  | 213 (267)  | 181 (227)   | 243 (412)   | 0.20    |
|                     | Primary non-response       |              | 100 (151)  | 181 (273)  | 181 (243)   | 212 (246)   | 0.04    |
|                     | Loss of secondary response |              | 503 (586)  | 487 (465)  | 454 (426)   | 563 (402)   | 0.90    |
|                     | Sustained remission        |              | 579 (245)  | 499 (229)  | 458 (N/A)   | 546 (N/A)   | 0.68    |
|                     | Other                      |              | 365 (532)  | 380 (738)  | 258 (397)   | 245 (614)   | 0.47    |

| B. Ulcerative colitis  |                            |              |            |            |           |             |             |             |         |
|------------------------|----------------------------|--------------|------------|------------|-----------|-------------|-------------|-------------|---------|
|                        |                            |              | Infliximab | Adalimumab | Golimumab | Ustekinumab | Vedolizumab | Tofacitinib | P value |
| 1 <sup>st</sup><br>LoT | Adverse event              | Median (IQR) | 121 (334)  | 183 (306)  | 168 (272) | 62 (N/A)    | 275 (303)   | N/A         | 0.18    |
|                        | Primary non-response       |              | 62 (93)    | 122 (120)  | 120 (92)  | 92 (60)     | 123 (152)   | N/A         | <0.001  |
|                        | Loss of secondary response |              | 305 (278)  | 335 (571)  | 271 (365) | 396 (357)   | 532 (577)   | N/A         | <0.001  |
|                        | Sustained remission        |              | 700 (446)  | 472 (380)  | 547 (212) | 0 (0)       | 852 (388)   | N/A         | 0.84    |
|                        | Other                      |              | 274 (431)  | 244 (471)  | 124 (233) | 122 (N/A)   | 247 (429)   | N/A         | 0.09    |
|                        |                            |              |            |            |           |             |             |             |         |
| 2 <sup>nd</sup><br>LoT | Adverse event              | Median (IQR) | 227 (266)  | 243 (410)  | 274 (395) | 184 (0)     | 107 (405)   | N/A         | 0.98    |
|                        | Primary non-response       |              | 120 (130)  | 122 (136)  | 120 (39)  | 123 (153)   | 122 (144)   | N/A         | 0.83    |
|                        | Loss of secondary response |              | 244 (274)  | 305 (252)  | 411 (470) | 517 (426)   | 411 (441)   | N/A         | 0.004   |
|                        | Sustained remission        |              | 883 (670)  | 791 (190)  | 806 (76)  | 0 (0)       | 487 (319)   | N/A         | 0.19    |
|                        | Other                      |              | 273 (519)  | 160 (745)  | 77 (81)   | 365 (260)   | 214 (152)   | N/A         | 0.02    |

**SUPPLEMENTARY TABLE S7:** Targeted therapy chosen in 2<sup>nd</sup> line of treatment (LoT) depending on the reason for discontinuation of the 1<sup>st</sup> LoT. Values are provided as number of treatments (n).

| <b>A. Crohn's disease</b>    |                                                                                |                                                                                |                                                              |                                                                               |
|------------------------------|--------------------------------------------------------------------------------|--------------------------------------------------------------------------------|--------------------------------------------------------------|-------------------------------------------------------------------------------|
|                              | Primary non-response                                                           | Loss of secondary response                                                     | Adverse event                                                | Sustained remission                                                           |
| Infliximab                   | <b>Ustekinumab (25)</b><br>Vedolizumab (11)<br>Adalimumab (14)                 | <b>Adalimumab (27)</b><br>Vedolizumab (12)<br>Ustekinumab (10)                 | <b>Adalimumab (13)</b><br>Ustekinumab (4)<br>Vedolizumab (2) | <b>Infliximab (8)</b><br>Adalimumab (4)<br>Ustekinumab (1)                    |
| Adalimumab                   | <b>Ustekinumab (40)</b><br>Infliximab (28)<br>Vedolizumab (13)                 | <b>Infliximab (34)</b><br>Ustekinumab (24)<br>Vedolizumab (17)                 | <b>Infliximab (29)</b><br>Ustekinumab (8)<br>Vedolizumab (5) | <b>Adalimumab (4)</b><br><b>Ustekinumab (4)</b>                               |
| <b>B. Ulcerative colitis</b> |                                                                                |                                                                                |                                                              |                                                                               |
| Infliximab                   | <b>Vedolizumab (48)</b><br>Adalimumab (19)<br>Golimumab (5)<br>Ustekinumab (1) | <b>Vedolizumab (31)</b><br>Adalimumab (16)<br>Golimumab (9)<br>Ustekinumab (1) | <b>Adalimumab (7)</b><br>Vedolizumab (6)                     | <b>Infliximab (5)</b><br>Adalimumab (3)<br>Vedolizumab (2)<br>Ustekinumab (1) |
| Adalimumab                   | <b>Vedolizumab (21)</b><br>Infliximab (19)<br>Golimumab (4)<br>Ustekinumab (3) | <b>Vedolizumab (20)</b><br>Infliximab (6)<br>Golimumab (3)                     | <b>Infliximab (5)</b><br>Golimumab (1)<br>Vedolizumab (1)    |                                                                               |
| Golimumab                    | <b>Infliximab (18)</b><br>Vedolizumab (8)<br>Adalimumab (6)                    | <b>Infliximab (15)</b><br>Vedolizumab (7)<br>Adalimumab (4)                    | <b>Infliximab (7)</b><br>Adalimumab (3)                      | <b>Golimumab (2)</b>                                                          |



**SUPPLEMENTARY TABLE S8:** Prescription of targeted therapies for ulcerative colitis in 2016 (A) and 2021 (B) by line of treatment (LoT)

| <b>A</b> |                                  | 1 <sup>st</sup> LoT | 2 <sup>nd</sup> LoT | 3 <sup>rd</sup> LoT | 4 <sup>th</sup> LoT | 5 <sup>th</sup> LoT | 6 <sup>th</sup> LoT | Total      |
|----------|----------------------------------|---------------------|---------------------|---------------------|---------------------|---------------------|---------------------|------------|
| 2016     | anti-TNF $\alpha$ , <i>n</i> (%) | 447 (86.2)          | 78 (55)             | 1 (8.3)             | 0 (0)               | 0 (0)               | 0 (0.)              | 526 (78)   |
|          | Infliximab, <i>n</i> (%)         | 253 (48.8)          | 33 (23.3)           | 1 (8.3)             | 0 (0)               | 0 (0)               | 0 (0)               | 287 (42.6) |
|          | Adalimumab, <i>n</i> (%)         | 131 (25.3)          | 31 (21.8)           | 0 (0)               | 0 (0)               | 0 (0)               | 0 (0)               | 162 (24)   |
|          | Golimumab, <i>n</i> (%)          | 63 (12.1)           | 14 (9.9)            | 0 (0)               | 0 (0)               | 0 (0)               | 0 (0)               | 77 (11.4)  |
|          | Vedolizumab, <i>n</i> (%)        | 71 (13.7)           | 64 (45.1)           | 11 (91.7)           | 0 (0)               | 0 (0)               | 0 (0)               | 146 (21.7) |
|          | Ustekinumab, <i>n</i> (%)        | 1 (0.2)             | 0 (0)               | 0 (0)               | 0 (0)               | 0 (0)               | 0 (0)               | 1 (0.1)    |
|          | Tofacitinib, <i>n</i> (%)        | 0 (0)               | 0 (0)               | 0 (0)               | 0 (0)               | 0 (0)               | 0 (0)               | 0 (0)      |
|          | Overall, <i>n</i>                | 519                 | 142                 | 12                  | 0                   | 0                   | 0                   | 673        |
| <b>B</b> |                                  | 1 <sup>st</sup> LoT | 2 <sup>nd</sup> LoT | 3 <sup>rd</sup> LoT | 4 <sup>th</sup> LoT | 5 <sup>th</sup> LoT | 6 <sup>th</sup> LoT | Total      |
| 2021     | anti-TNF $\alpha$ , <i>n</i> (%) | 222 (83.1)          | 59 (38.7)           | 16 (20.9)           | 5 (15.1)            | 1 (10)              | 1 (33.3)            | 304 (56.1) |
|          | Infliximab, <i>n</i> (%)         | 116 (43.4)          | 32 (21)             | 10 (13.1)           | 2 (6.1)             | 1 (10)              | 0 (0)               | 161 (29.7) |
|          | Adalimumab, <i>n</i> (%)         | 89 (33.3)           | 23 (15.1)           | 5 (6.5)             | 2 (6)               | 0 (0)               | 0 (0)               | 119 (22)   |
|          | Golimumab, <i>n</i> (%)          | 17 (6.4)            | 4 (2.6)             | 1 (1.3)             | 1 (3)               | 0 (0)               | 1 (33.3)            | 24 (4.4)   |
|          | Vedolizumab, <i>n</i> (%)        | 35 (13.1)           | 55 (36.2)           | 19 (25)             | 1 (3)               | 1 (10)              | 0 (0)               | 111 (20.5) |
|          | Ustekinumab, <i>n</i> (%)        | 8 (3)               | 21 (13.8)           | 23 (30.3)           | 13 (39.4)           | 5 (50)              | 1 (33.3)            | 71 (13.1)  |
|          | Tofacitinib, <i>n</i> (%)        | 2 (0.7)             | 17 (11.2)           | 18 (23.7)           | 14 (42.4)           | 3 (30)              | 1 (33.3)            | 55 (10.2)  |
|          | Overall, <i>n</i>                | 267                 | 152                 | 76                  | 33                  | 10                  | 3                   | 541        |
